# Supplementary material
Source: HighWire-hosted journal article supplement (https://bmjopen.bmj.com/content/12/6/e055499)
Supplement: inline-supplementary-material-1 [file inline-supplementary-material-1.pdf]

**Supplementary File: Search strategy for search #1 on 26<sup>th</sup> September 2019**

PubMed:

| <b>Smoking</b>                                                                                                | <b>Mental Illness</b>                                                                                                                                                                                                                                                                                                                                                                                                                                                                                                                                                                                                                                                                                                                                                                                                                                                                                                                                                                                                                                                                                                                                                                                                                                                    | <b>Study type</b>                                                                | <b>Number of results</b> |
|---------------------------------------------------------------------------------------------------------------|--------------------------------------------------------------------------------------------------------------------------------------------------------------------------------------------------------------------------------------------------------------------------------------------------------------------------------------------------------------------------------------------------------------------------------------------------------------------------------------------------------------------------------------------------------------------------------------------------------------------------------------------------------------------------------------------------------------------------------------------------------------------------------------------------------------------------------------------------------------------------------------------------------------------------------------------------------------------------------------------------------------------------------------------------------------------------------------------------------------------------------------------------------------------------------------------------------------------------------------------------------------------------|----------------------------------------------------------------------------------|--------------------------|
| “tobacco smoking”[mh] OR “smoking”[mh] OR tobacco[tiab] OR cigarette*[tiab] OR smoking[tiab] OR smoker*[tiab] | (“Anxiety Disorders”[mh] OR “Bipolar and Related Disorders”[mh] OR “Disruptive, Impulse Control, and Conduct Disorders”[mh] OR “Dissociative Disorders”[mh] OR “Feeding and Eating Disorders”[mh] OR “Mood Disorders”[mh] OR “Personality Disorders”[mh] OR “Schizophrenia Spectrum and Other Psychotic Disorders”[mh] OR “Substance-Related Disorders”[mh] OR “Trauma and Stressor Related Disorders”[mh])<br><br>OR<br><br>(disorder[Title/Abstract] OR mental[Title/Abstract] OR schizophre*[Title/Abstract] OR catatoni*[Title/Abstract] OR bipolar[Title/Abstract] OR psychosis[Title/Abstract] OR psychotic[Title/Abstract] OR depress*[Title/Abstract] OR Cyclothymi* [Title/Abstract] OR Dysphori*[Title/Abstract] OR “selective mutism”[Title/Abstract] OR Trichotillomania[Title/Abstract] OR dereali*[Title/Abstract] OR mood[Title/Abstract] OR anxi*[Title/Abstract] OR phobia[Title/Abstract] OR dysthymia[Title/Abstract] OR manic[Title/Abstract] OR mania[Title/Abstract] OR dissociat*[Title/Abstract] OR depersonali*[Title/Abstract] OR pica[Title/Abstract] OR anorexia[Title/Abstract] OR bulimia[Title/Abstract] OR binge eating[Title/Abstract] OR substance[Title/Abstract] OR posttraumatic[Title/Abstract] OR post-traumatic[Title/Abstract]) | “longitudinal”[tiab] OR “follow up”[tiab] OR “follow-up”[tiab] OR “cohort”[tiab] | 9089                     |

Embase:

| Smoking                                                                                              | Mental Illness                                                                                                                                                                                                                                                                                                                                                                                                                                                                                                                                                                                                                                                                                                                                                                                                                                                                                          | Study type                                                              | filters                                         | Number of results |
|------------------------------------------------------------------------------------------------------|---------------------------------------------------------------------------------------------------------------------------------------------------------------------------------------------------------------------------------------------------------------------------------------------------------------------------------------------------------------------------------------------------------------------------------------------------------------------------------------------------------------------------------------------------------------------------------------------------------------------------------------------------------------------------------------------------------------------------------------------------------------------------------------------------------------------------------------------------------------------------------------------------------|-------------------------------------------------------------------------|-------------------------------------------------|-------------------|
| “tobacco use”/exp<br>OR tobacco:ti,ab OR<br>cigarette*:ti,ab OR<br>smoking:ti,ab OR<br>smoker*:ti,ab | (“anxiety disorder”/exp OR “mood<br>disorder”/exp OR “behaviour disorder”/exp<br>OR “dissociative disorder”/exp OR<br>“personality disorder”/exp OR<br>“Psychosis”/exp OR “drug dependence”/exp<br>OR Adjustment disorder/de OR<br>Neurosis/exp (includes dysthymia) OR<br>Psychotrauma/de)<br><br>OR<br><br>(disorder:ti,ab OR mental:ti,ab OR<br>schizophre*:ti,ab OR catatoni*:ti,ab OR<br>bipolar:ti,ab OR psychosis:ti,ab OR<br>psychotic:ti,ab OR depress*:ti,ab OR<br>Cyclothymi* :ti,ab OR Dysphori*:ti,ab OR<br>“selective mutism”:ti,ab OR<br>Trichotillomania:ti,ab OR dereali*:ti,ab OR<br>mood:ti,ab OR anxi*:ti,ab OR phobia:ti,ab<br>OR dysthymia:ti,ab OR manic:ti,ab OR<br>mania:ti,ab OR dissociat*:ti,ab OR<br>depersonali*:ti,ab OR pica:ti,ab OR<br>anorexia:ti,ab OR bulimia:ti,ab OR binge<br>eating:ti,ab OR substance:ti,ab OR<br>posttraumatic:ti,ab OR post-traumatic:ti,ab) | “longitudinal”:ti,ab<br>OR<br>“follow up”:ti,ab<br>OR<br>“cohort”:ti,ab | AND<br>[english]/lim<br><br>AND<br>[embase]/lim | 2306              |

| <b>Pubmed mesh term</b>                              | <b>Emtree term</b>                                                             |
|------------------------------------------------------|--------------------------------------------------------------------------------|
| anxiety disorders                                    | “anxiety disorder”/exp                                                         |
| Bipolar and Related Disorders                        | “mood disorder”/exp                                                            |
| Disruptive, Impulse Control, and Conduct Disorders   | “behaviour disorder”/exp                                                       |
| Dissociative Disorders                               | “dissociative disorder”/exp                                                    |
| Feeding and Eating Disorders                         | “behaviour disorder”/exp                                                       |
| Mood Disorders                                       | “mood disorder”/exp                                                            |
| Personality Disorders                                | “personality disorder”/exp                                                     |
| Schizophrenia Spectrum and Other Psychotic Disorders | “Psychosis”/exp                                                                |
| Substance-Related Disorders                          | “drug dependence”/exp                                                          |
| Trauma and Stressor Related Disorders                | “anxiety disorder”/exp                                                         |
|                                                      | Adjustment disorder/de<br>Neurosis/exp (includes dysthymia)<br>Psychotrauma/de |

## PsycINFO:

| Smoking                                                                                        | Mental Illness                                                                                                                                                                                                                                                                                                                                                                                                                                                                                                                                                                                                                                                                                                                                                                                                                                                                                                         | Study type                                              | filters | Number of citations |
|------------------------------------------------------------------------------------------------|------------------------------------------------------------------------------------------------------------------------------------------------------------------------------------------------------------------------------------------------------------------------------------------------------------------------------------------------------------------------------------------------------------------------------------------------------------------------------------------------------------------------------------------------------------------------------------------------------------------------------------------------------------------------------------------------------------------------------------------------------------------------------------------------------------------------------------------------------------------------------------------------------------------------|---------------------------------------------------------|---------|---------------------|
| (exp tobacco smoking"OR tobacco.ti,ab OR cigarette\$.ti,ab OR smoking.ti,ab OR smoker\$.ti,ab) | (exp Anxiety Disorders OR exp Bipolar Disorder OR exp Disruptive Behavior Disorders OR exp Attention Deficit Disorder OR exp Dissociative Disorders OR exp Eating Disorders OR exp Affective Disorders OR exp Personality Disorders OR exp Psychosis OR exp Substance Related and Addictive Disorders OR exp Stress and Trauma Related Disorders)<br>OR<br>(disorder.ti,ab OR mental.ti,ab OR schizophreni\$.ti,ab OR catatoni\$.ti,ab OR bipolar.ti,ab OR psychosis.ti,ab OR psychotic.ti,ab OR depress\$.ti,ab OR Cyclothymi\$.ti,ab OR Dysphori\$.ti,ab OR selective mutism.ti,ab OR Trichotillomania.ti,ab OR dereali\$.ti,ab OR mood.ti,ab OR anxi\$.ti,ab OR phobia.ti,ab OR dysthymia.ti,ab OR manic.ti,ab OR mania.ti,ab OR dissociat\$.ti,ab OR depersonali\$.ti,ab OR pica.ti,ab OR anorexia.ti,ab OR bulimia.ti,ab OR binge eating.ti,ab OR substance.ti,ab OR posttraumatic.ti,ab OR post-traumatic.ti,ab) | (longitudinal.ti,ab OR Follow up.ti,ab OR cohort.ti,ab) | english | 3648                |

## Thesaurus terms:

| Pubmed mesh term                                     | Psyc Info thesaurus term                                          |
|------------------------------------------------------|-------------------------------------------------------------------|
| anxiety disorders                                    | exp Anxiety Disorders                                             |
| Bipolar and Related Disorders                        | exp Bipolar Disorder                                              |
| Disruptive, Impulse Control, and Conduct Disorders   | exp Disruptive Behavior Disorders, exp Attention Deficit Disorder |
| Dissociative Disorders                               | exp Dissociative Disorders                                        |
| Feeding and Eating Disorders                         | exp Eating Disorders                                              |
| Mood Disorders                                       | exp Affective Disorders                                           |
| Personality Disorders                                | exp Personality Disorders                                         |
| Schizophrenia Spectrum and Other Psychotic Disorders | exp Psychosis                                                     |
| Substance-Related Disorders                          | exp Substance Related and Addictive Disorders                     |
| Trauma and Stressor Related Disorders                | exp Stress and Trauma Related Disorders                           |
|                                                      |                                                                   |

## Scopus:

| Smoking                                                                                      | Mental Illness                                                                                                                                                                                                                                                                                                                                                                                                      | Study type                                                                             | Number of results |
|----------------------------------------------------------------------------------------------|---------------------------------------------------------------------------------------------------------------------------------------------------------------------------------------------------------------------------------------------------------------------------------------------------------------------------------------------------------------------------------------------------------------------|----------------------------------------------------------------------------------------|-------------------|
| tobacco OR cigarette* OR smoking OR smoker*<br><br>Select 'article title, abstract, keywords | disorder OR mental OR schizophreni* OR catatoni* OR bipolar OR psychosis OR psychotic OR depress* OR Cyclothymi* OR Dysphori* OR { mutism } OR Trichotillomania OR dereali* OR mood OR anxi* OR phobia OR dysthymia OR manic OR mania OR dissociat* OR depersonali* OR pica OR anorexia OR bulimia OR binge eating OR substance OR posttraumatic OR post-traumatic<br><br>Select 'article title, abstract, keywords | longitudinal OR "follow up" OR cohort<br><br>Select 'article title, abstract, keywords | 17,532            |

## CINAHL:

| Smoking                                                                                                                                                  | Mental Illness                                                                                                                                                                                                                                                                                                                                                                                                                                                                                                                                                                                                                                                                                                                                                                                                                                                                                                                                                                                                                                                                                                                                                                                                                                                                                              | Study type                                                                                                                   | Number of results |
|----------------------------------------------------------------------------------------------------------------------------------------------------------|-------------------------------------------------------------------------------------------------------------------------------------------------------------------------------------------------------------------------------------------------------------------------------------------------------------------------------------------------------------------------------------------------------------------------------------------------------------------------------------------------------------------------------------------------------------------------------------------------------------------------------------------------------------------------------------------------------------------------------------------------------------------------------------------------------------------------------------------------------------------------------------------------------------------------------------------------------------------------------------------------------------------------------------------------------------------------------------------------------------------------------------------------------------------------------------------------------------------------------------------------------------------------------------------------------------|------------------------------------------------------------------------------------------------------------------------------|-------------------|
| MH tobacco smoking+ OR TI tobacco OR AB tobacco OR TI cigarette* OR AB cigarette* OR TI smoking OR AB smoking OR TI smoker* OR AB smoker* OR MH smoking+ | MH Anxiety Disorders+ OR MH Bipolar Disorder+ OR MH Impulse control disorders+ OR MH Social behaviour disorders+ OR MH Mental Disorders Diagnosed in Childhood+ OR MH Dissociative Disorders+ OR MH Eating Disorders+ OR MH Affective Disorders+ OR MH Personality Disorders+ OR MH Psychotic Disorders+ OR MH Substance Use Disorders+ OR MH Stress Disorders, Post-Traumatic+ OR TI disorder OR AB disorder OR TI mental OR AB mental OR TI schizophre* OR AB schizophre* OR TI catatoni* OR AB catatoni* OR TI bipolar OR AB bipolar OR TI psychosis OR AB psychosis OR TI psychotic OR AB psychotic OR TI depress* OR AB depress* OR TI Cyclothymi* OR AB Cyclothymi* OR TI Dysphori* OR AB Dysphori* OR TI selective mutism OR AB selective mutism OR TI Trichotillomania OR AB Trichotillomania OR TI dereali* OR AB dereali* OR TI mood OR AB mood OR TI anxi* OR AB anxi* OR TI phobia OR AB phobia OR TI dysthymia OR AB dysthymia OR TI manic OR AB manic OR TI mania OR AB mania OR TI dissociat* OR AB dissociat* OR TI depersonali* OR AB depersonali* OR TI pica OR AB pica OR TI anorexia OR AB anorexia OR TI bulimia OR AB bulimia OR TI binge eating OR AB binge eating OR TI substance OR AB substance OR TI posttraumatic OR AB posttraumatic OR TI post-traumatic OR AB post-traumatic | TI longitudinal OR AB longitudinal OR TI follow up OR AB follow up OR TI follow-up OR AB follow-up OR TI cohort OR AB cohort | 11,037            |

| <b>Pubmed mesh term</b>                              | <b>Cinahl subject heading</b>                                                                         |
|------------------------------------------------------|-------------------------------------------------------------------------------------------------------|
| anxiety disorders                                    | Anxiety Disorders+                                                                                    |
| Bipolar and Related Disorders                        | Bipolar Disorder+                                                                                     |
| Disruptive, Impulse Control, and Conduct Disorders   | Impulse control disorders+<br>Social behaviour disorders+<br>Mental Disorders Diagnosed in Childhood+ |
| Dissociative Disorders                               | Dissociative Disorders+                                                                               |
| Feeding and Eating Disorders                         | Eating Disorders+                                                                                     |
| Mood Disorders                                       | Affective Disorders+                                                                                  |
| Personality Disorders                                | Personality Disorders+                                                                                |
| Schizophrenia Spectrum and Other Psychotic Disorders | Psychotic Disorders+                                                                                  |
| Substance-Related Disorders                          | Substance Use Disorders+                                                                              |
| Trauma and Stressor Related Disorders                | Stress Disorders, Post-Traumatic+                                                                     |

### Overview of results for search #2 on 11<sup>th</sup> May 2021

| Database                 | Result                                                                                                                               | Date              |
|--------------------------|--------------------------------------------------------------------------------------------------------------------------------------|-------------------|
| Pubmed                   | <b>1607</b>                                                                                                                          | <b>11/05/2021</b> |
| CINAHL                   | <b>1555</b>                                                                                                                          | <b>11/05/2021</b> |
| Embase                   | <b>Not available to Flinders Library but 100% of Embase content is available within Scopus and therefore included in this search</b> |                   |
| SCOPUS                   | <b>758</b>                                                                                                                           | <b>11/05/2021</b> |
| Psycinfo                 | <b>483</b>                                                                                                                           | <b>11/05/2021</b> |
|                          |                                                                                                                                      |                   |
| <b>TOTAL</b>             | <b>4403</b>                                                                                                                          |                   |
| <b>Deduplicate TOTAL</b> | <b>3132</b>                                                                                                                          |                   |

**Table S2 – Quality appraisal scores for cohort studies (n = 49)**

| Study                       | Q1  | Q2  | Q3 | Q4 | Q5 | Q6 | Q7 | Q8 | Q9 | Q10 | Q11 | Score % |
|-----------------------------|-----|-----|----|----|----|----|----|----|----|-----|-----|---------|
| Ajdacic-Gross et al. (2009) | N/A | N/A | Y  | Y  | Y  | N  | Y  | Y  | Y  | U   | Y   | 63.6    |
| Ames et al. (2018)          | U   | Y   | Y  | Y  | Y  | N  | Y  | Y  | Y  | U   | Y   | 72.7    |
| Berk et al. (2010)          | N/A | N/A | Y  | Y  | Y  | N  | Y  | Y  | Y  | Y   | Y   | 72.7    |
| Bierhoff et al. (2019)      | N/A | N/A | Y  | N  | N  | N  | Y  | Y  | N  | N   | Y   | 36.4    |
| Borges et al. (2018)        | N/A | N/A | Y  | Y  | Y  | N  | Y  | Y  | Y  | Y   | Y   | 72.7    |
| Buchy et al. (2014)         | Y   | Y   | Y  | U  | U  | Y  | Y  | Y  | U  | U   | Y   | 63.6    |
| Buchy et al. (2015)         | N   | Y   | Y  | Y  | U  | N  | Y  | Y  | N  | U   | Y   | 54.5    |
| Bulhões et al. (2020)       | N/A | N/A | Y  | Y  | Y  | N  | Y  | Y  | N  | U   | Y   | 54.5    |
| Chen et al. (2017)          | N/A | N/A | Y  | N  | N  | N  | Y  | Y  | Y  | U   | Y   | 45.5    |
| Crane et al. (2021)         | N/A | N/A | Y  | Y  | Y  | N  | Y  | Y  | Y  | Y   | Y   | 72.7    |
| Davies et al. (2018)        | Y   | Y   | Y  | Y  | Y  | N  | Y  | Y  | N  | U   | Y   | 72.7    |
| Ferdinand et al. (2004)     | N/A | N/A | Y  | Y  | Y  | N  | Y  | Y  | N  | U   | Y   | 54.5    |
| Fonseca et al. (2021)       | N/A | N/A | Y  | Y  | N  | Y  | Y  | Y  | N  | N   | Y   | 54.5    |
| Gage et al. (2014)          | N   | Y   | Y  | Y  | Y  | N  | Y  | Y  | N  | Y   | Y   | 72.7    |
| Gårdvik et al. (2020)       | N/A | N/A | Y  | Y  | Y  | N  | Y  | Y  | Y  | Y   | Y   | 72.7    |
| Goodwin et al. (2004)       | N/A | N/A | Y  | Y  | Y  | N  | Y  | Y  | Y  | Y   | Y   | 72.7    |
| Goodwin et al. (2013)       | N/A | N/A | Y  | Y  | Y  | N  | Y  | Y  | N  | N   | Y   | 54.5    |
| Griesler et al. (2008)      | U   | Y   | Y  | Y  | Y  | N  | Y  | Y  | Y  | N   | Y   | 72.7    |
| Griesler et al. (2011)      | N/A | N/A | Y  | Y  | Y  | N  | Y  | Y  | Y  | Y   | Y   | 72.7    |
| Hu et al. (2012)            | N   | Y   | Y  | Y  | Y  | N  | Y  | Y  | Y  | Y   | Y   | 81.8    |
| Hui et al. (2013)           | N/A | N/A | Y  | U  | N  | Y  | Y  | Y  | Y  | Y   | Y   | 63.6    |



|                           |     |     |   |   |   |   |   |   |   |   |   |      |
|---------------------------|-----|-----|---|---|---|---|---|---|---|---|---|------|
| Isensee et al. (2003)     | N/A | N/A | Y | Y | Y | N | Y | Y | Y | Y | Y | 72.7 |
| Johnson et al. (2000)     | N/A | N/A | Y | Y | Y | N | Y | Y | Y | Y | Y | 72.7 |
| Jones et al. (2018)       | N/A | N/A | Y | Y | Y | N | Y | Y | Y | U | Y | 63.6 |
| Kalan et al. (2020)       | N/A | N/A | Y | Y | Y | N | Y | Y | N | N | Y | 54.5 |
| Kendler et al. (2015)     | N/A | N/A | Y | Y | Y | N | U | Y | N | U | Y | 45.5 |
| King et al. (2004)        | N/A | N/A | Y | Y | Y | N | Y | Y | Y | Y | Y | 72.7 |
| MacKie et al. (2011)      | Y   | Y   | Y | U | U | N | Y | Y | N | U | Y | 54.5 |
| Marmorstein et al. (2010) | N/A | N/A | Y | Y | Y | N | Y | Y | Y | N | Y | 63.6 |
| Marsden et al. (2019)     | N/A | N/A | Y | Y | Y | N | Y | Y | N | U | Y | 54.5 |
| Moylan et al. (2013)      | N/A | N/A | Y | Y | Y | N | Y | Y | Y | Y | Y | 72.7 |
| Mustonen et al. (2018)    | N   | Y   | Y | Y | Y | N | U | Y | Y | Y | Y | 72.7 |
| Okeke et al. (2013)       | N/A | N/A | Y | Y | Y | N | Y | Y | N | U | Y | 54.5 |
| Pedersen et al. (2009)    | N/A | N/A | Y | Y | Y | N | Y | Y | N | U | Y | 54.5 |
| Purborini et al. (2021)   | N/A | N/A | Y | Y | Y | Y | Y | Y | Y | Y | Y | 81.8 |
| Raffetti et al. (2019)    | N/A | N/A | Y | Y | Y | N | Y | Y | Y | Y | Y | 72.7 |
| Ranjit et al. (2019)      | N/A | N/A | Y | Y | Y | N | Y | Y | Y | Y | Y | 72.7 |
| Ranjit et al. (2019b*)    | N/A | N/A | Y | Y | Y | N | Y | Y | N | U | Y | 54.5 |
| Savageet al. (2016)       | N/A | N/A | Y | U | N | N | Y | Y | Y | U | Y | 45.5 |
| Shete et al. (2017)       | N   | Y   | U | U | N | N | Y | Y | N | U | Y | 36.4 |
| Smith et al. (2014)       | U   | Y   | Y | Y | Y | N | Y | Y | Y | Y | Y | 81.8 |
| Swendsen et al. (2010)    | N/A | N/A | Y | Y | Y | U | Y | Y | Y | Y | Y | 72.7 |
| Tomita et al. (2018)      | U   | Y   | U | Y | Y | Y | Y | Y | N | U | Y | 63.6 |
| Trotta et al. (2020)      | N/A | N/A | Y | Y | Y | N | U | Y | Y | Y | Y | 63.6 |
| Ward et al. (2019)        | U   | Y   | Y | Y | Y | Y | Y | Y | N | U | Y | 72.7 |

|                      |     |      |      |      |      |      |      |       |      |      |       |      |
|----------------------|-----|------|------|------|------|------|------|-------|------|------|-------|------|
| Weiser et al. (2004) | N/A | N/A  | Y    | Y    | Y    | Y    | U    | Y     | Y    | Y    | Y     | 72.7 |
| Wilens et al. (2016) | N   | Y    | Y    | Y    | Y    | N    | Y    | Y     | N    | U    | Y     | 63.6 |
| Zammit et al. (2003) | Y   | Y    | Y    | Y    | Y    | N    | U    | Y     | Y    | Y    | Y     | 81.8 |
| Zhang et al. (2018)  | N   | Y    | Y    | Y    | Y    | N    | Y    | Y     | Y    | U    | Y     | 72.7 |
| Total %              | 8.2 | 32.7 | 95.9 | 85.7 | 81.6 | 14.3 | 89.8 | 100.0 | 59.2 | 44.9 | 100.0 | -    |

*Note:* \*Testing the reciprocal association between smoking and depressive symptoms from adolescence to adulthood: A longitudinal twin study.

Y = Yes; N = No; U = Unclear; N/A = Not applicable. Q1 = Were the two groups similar and recruited from the same population?; Q2 = Were the exposures measured similarly to assign people to both exposed and unexposed groups?; Q3 = Was the exposure measured in a valid and reliable way?; Q4 = Were confounding factors identified?; Q5 = Were strategies to deal with confounding factors stated?; Q6 = Were the groups/participants free of the outcome at the start of the study (or at the moment of exposure)?; Q7 = Were the outcomes measured in a valid and reliable way?; Q8 = Was the follow up time reported and sufficient to be long enough for outcomes to occur?; Q9 = Was follow up complete, and if not, were the reasons to loss to follow up described and explored?; Q10 = Were strategies to address incomplete follow up utilized?; Q11 = Was appropriate statistical analysis used?

**Table S2 – Quality appraisal scores for systematic reviews (n = 4)**

| Study                      | Q1    | Q2    | Q3    | Q4    | Q5    | Q6  | Q7   | Q8    | Q9   | Q10   | Q11   | Score % |
|----------------------------|-------|-------|-------|-------|-------|-----|------|-------|------|-------|-------|---------|
| Ahun et al. (2020)         | Y     | Y     | Y     | Y     | Y     | U   | U    | Y     | U    | Y     | Y     | 72.7    |
| Cairns et al. (2014)       | Y     | Y     | Y     | Y     | Y     | U   | Y    | Y     | Y    | Y     | Y     | 90.9    |
| Chaiton et al. (2009)      | Y     | Y     | Y     | Y     | Y     | U   | U    | Y     | Y    | Y     | Y     | 81.8    |
| Esmaeelzadeh et al. (2018) | Y     | Y     | Y     | Y     | Y     | U   | U    | Y     | Y    | Y     | Y     | 81.8    |
| Total %                    | 100.0 | 100.0 | 100.0 | 100.0 | 100.0 | 0.0 | 25.0 | 100.0 | 75.0 | 100.0 | 100.0 | -       |

Y = Yes; N = No; U = Unclear; N/A = Not applicable. Q1 = Is the review question clearly and explicitly stated?; Q2 = Were the inclusion criteria appropriate for the review question?; Q3 = Was the search strategy appropriate?; Q4 = Were the sources and resources used to search for studies adequate?; Q5 = Were the criteria for appraising studies appropriate?; Q6 = Was critical appraisal conducted by two or more reviewers independently?; Q7 = Were there methods to minimize errors in data extraction?; Q8 = Were the methods used to combine studies appropriate?; Q9 = Was the likelihood of publication bias assessed?; Q10 = Were recommendations for policy and/or practice supported by the reported data?; Q11 = Were the specific directives for new research appropriate?
